# Supplementary material
Source: HighWire-hosted journal article supplement (https://cshprotocols.cshlp.org/content/suppl/2010/07/20/2010.8.pdb.prot5478)
Supplement: Duplex_PCR.pdf [file Duplex_PCR.pdf]

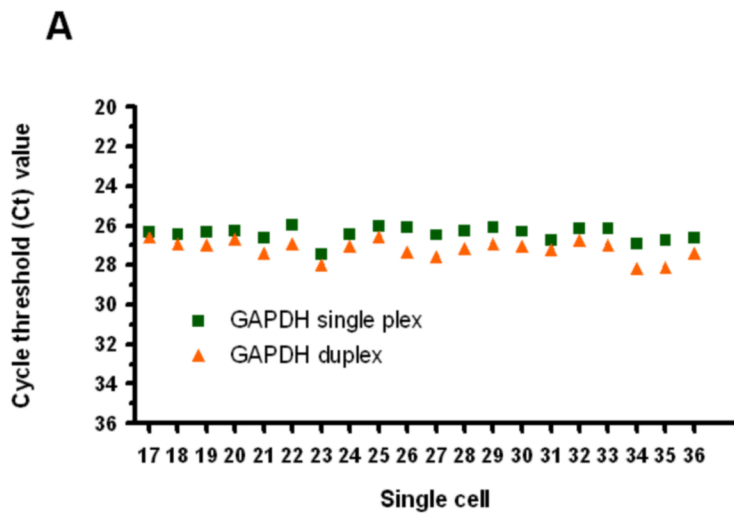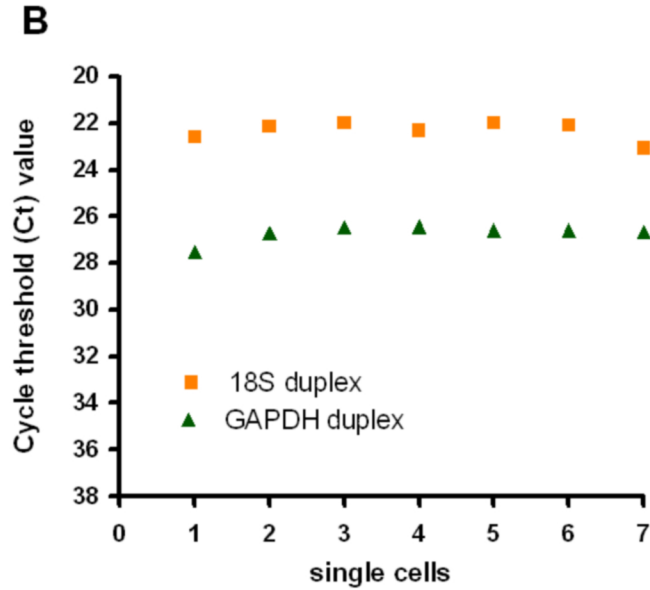

Validation of single cell PCR data carried out in single-plex and duplex. (A) Twenty single mesenchymal cells obtained from human bone marrow were collected and PCR for *gapdh* was carried out either using *gapdh* alone (FAM-MGB; single-plex) or along with 18S (VIC-MGB; duplex). We observed no significant variation in any of the single cells assessed, indicating that the efficiency of duplex PCR is equivalent to single-plex. Thus, inhibition/competition in gene amplification efficiency does not seem to occur during duplex PCR. (B) Duplex PCR for two housekeeping genes (18S and *gapdh*) was performed. Data demonstrate that the amplification rate for an individual gene is not affected when carried out in duplex. The scatter for both genes in each cell is similar for all the cells assessed here.
